# Supplementary material for: A Novel Handrub Tablet Loaded with Pre- and Post-Biotic Solid Lipid Nanoparticles Combining Virucidal Activity and Maintenance of the Skin Barrier and Microbiome
Source: MDPI journal article supplement (doi:10.3390/pharmaceutics15122793), 2023-12-17

## Supplementary Material

Table S1 – Table of Analysis of Variance for tablet base formulations DoE planning.

| Source                                                 | Dependent variables p-values |                          |          |         |          |          |
|--------------------------------------------------------|------------------------------|--------------------------|----------|---------|----------|----------|
|                                                        | Weight                       | Disintegra-<br>tion time | Swelling | Height  | Diameter | Hardness |
| Model                                                  | 0.019                        | 0.001                    | 0.009    | 0.000   | 0.891    | 0.110    |
| Linear                                                 | 0.007                        | 0.000                    | 0.004    | 0.000   | 0.783    | 0.093    |
| Diluent prop. (MCC %w/w)                               | 0.002                        | 0.000                    | 0.009    | 0.000   | 0.409    | 0.067    |
| [Disintegrant] (%w/w)                                  | 0.035                        | 0.076                    | 0.009    | 0.025   | 0.767    | 0.223    |
| Disintegrant prop. (SCC %w/W)                          | 0.148                        | 0.001                    | 0.003    | 0.007   | 0.795    | 0.079    |
| Square                                                 | 0.793                        | 0.016                    | 0.015    | 0.052   | 0.605    | 0.108    |
| Diluent prop. (MCC %w/w)*Diluent prop. (MCC %w/w)      | 0.793                        | 0.016                    | 0.015    | 0.052   | 0.605    | 0.108    |
| 2-Way Interaction                                      | 0.432                        | 0.012                    | 0.051    | 0.070   | 0.815    | 0.145    |
| Diluent prop. (MCC %w/w)*[Disintegrant] (%w/w)         | 0.582                        | 0.030                    | 0.558    | 0.066   | 0.870    | 1.000    |
| Diluent prop. (MCC %w/w)*Disintegrant prop. (SCC %w/W) | 0.597                        | 0.004                    | 0.017    | 0.066   | 0.438    | 0.356    |
| [Disintegrant] (%w/w)*Disintegrant prop. (SCC %w/W)    | 0.182                        | 0.546                    | 0.144    | 0.102   | 0.749    | 0.047    |
| Error                                                  |                              |                          |          |         |          |          |
| Lack-of-Fit                                            | 0.640                        | 0.428                    | 0.088    | 1.000   | 0.889    | *        |
| Pure Error                                             | -                            | -                        | -        | -       | -        | -        |
| Total                                                  | -                            | -                        | -        | -       | -        | -        |
| Model Summary                                          |                              |                          |          |         |          |          |
| S                                                      | 0.00064                      | 2.259                    | 34.943   | 0.01414 | 0.17830  | 1.0614   |
| R-sq                                                   | 97.60%                       | 99.70%                   | 98.58%   | 99.82%  | 44.31%   | 91.93%   |
| R-sq(adj)                                              | 92.00%                       | 98.99%                   | 95.25%   | 99.40%  | 0.00%    | 73.10%   |
| R-sq(pred)                                             | 75.37%                       | 93.18%                   | 23.59%   | 99.60%  | 0.00%    | 0.00%    |

Figure S1 – Pareto charts of the standardized effects for response surface method from tablet base formulations DoE planning.

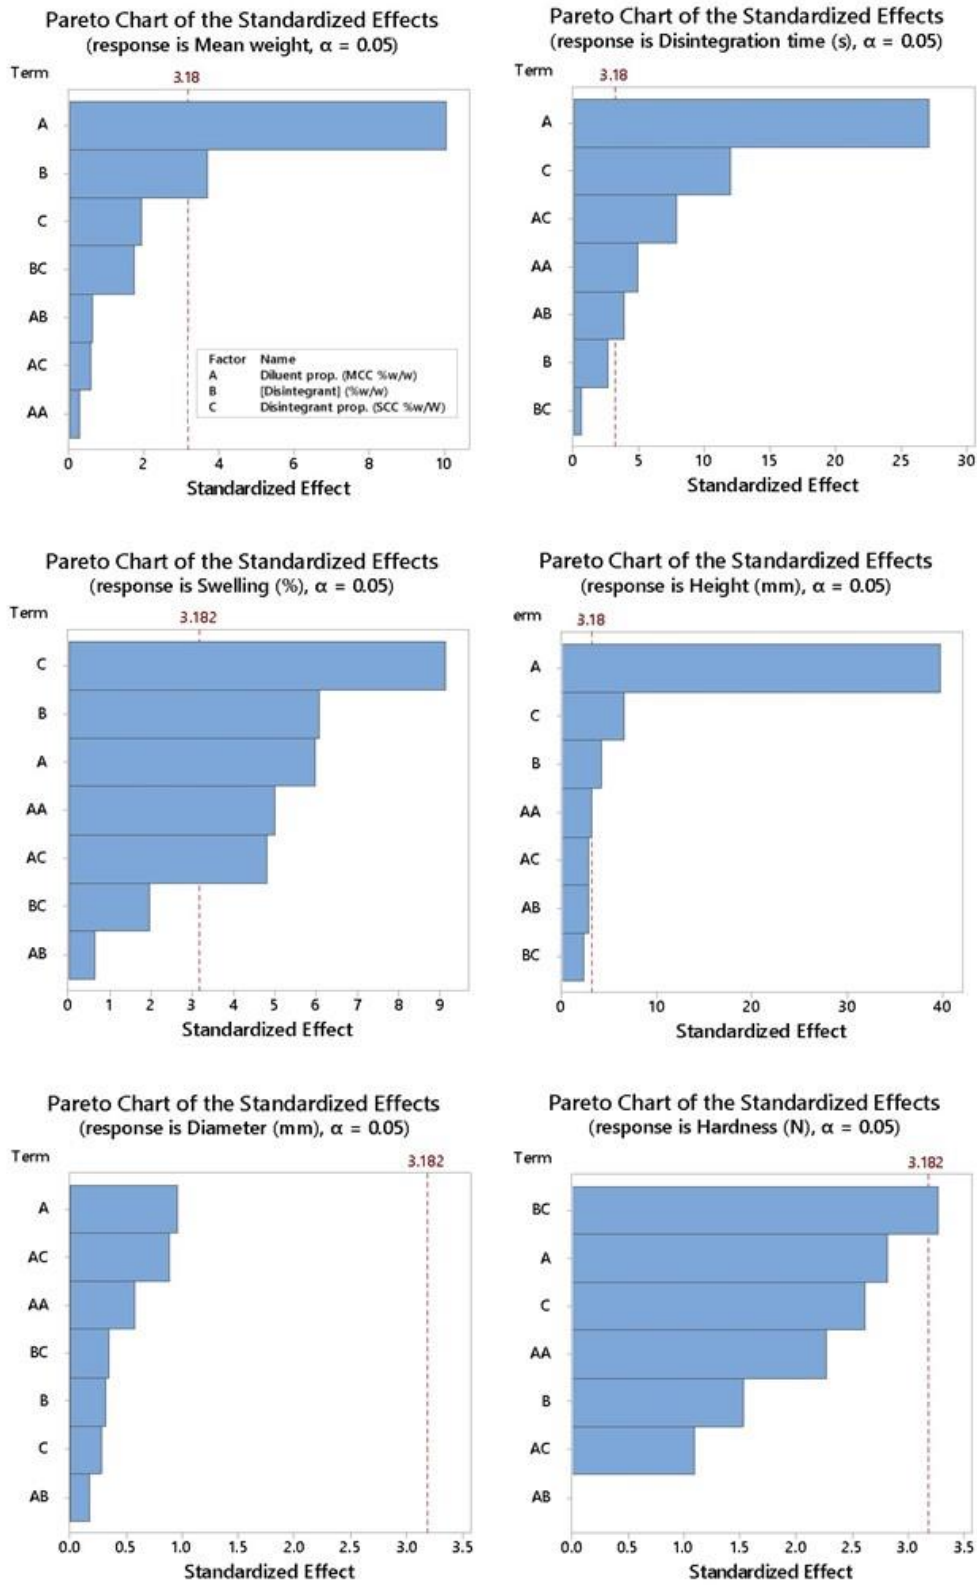

Figure S2 – Contour plots for response surface method considering parameters with significance in the analysis of variance from tablet base formulations DoE planning.

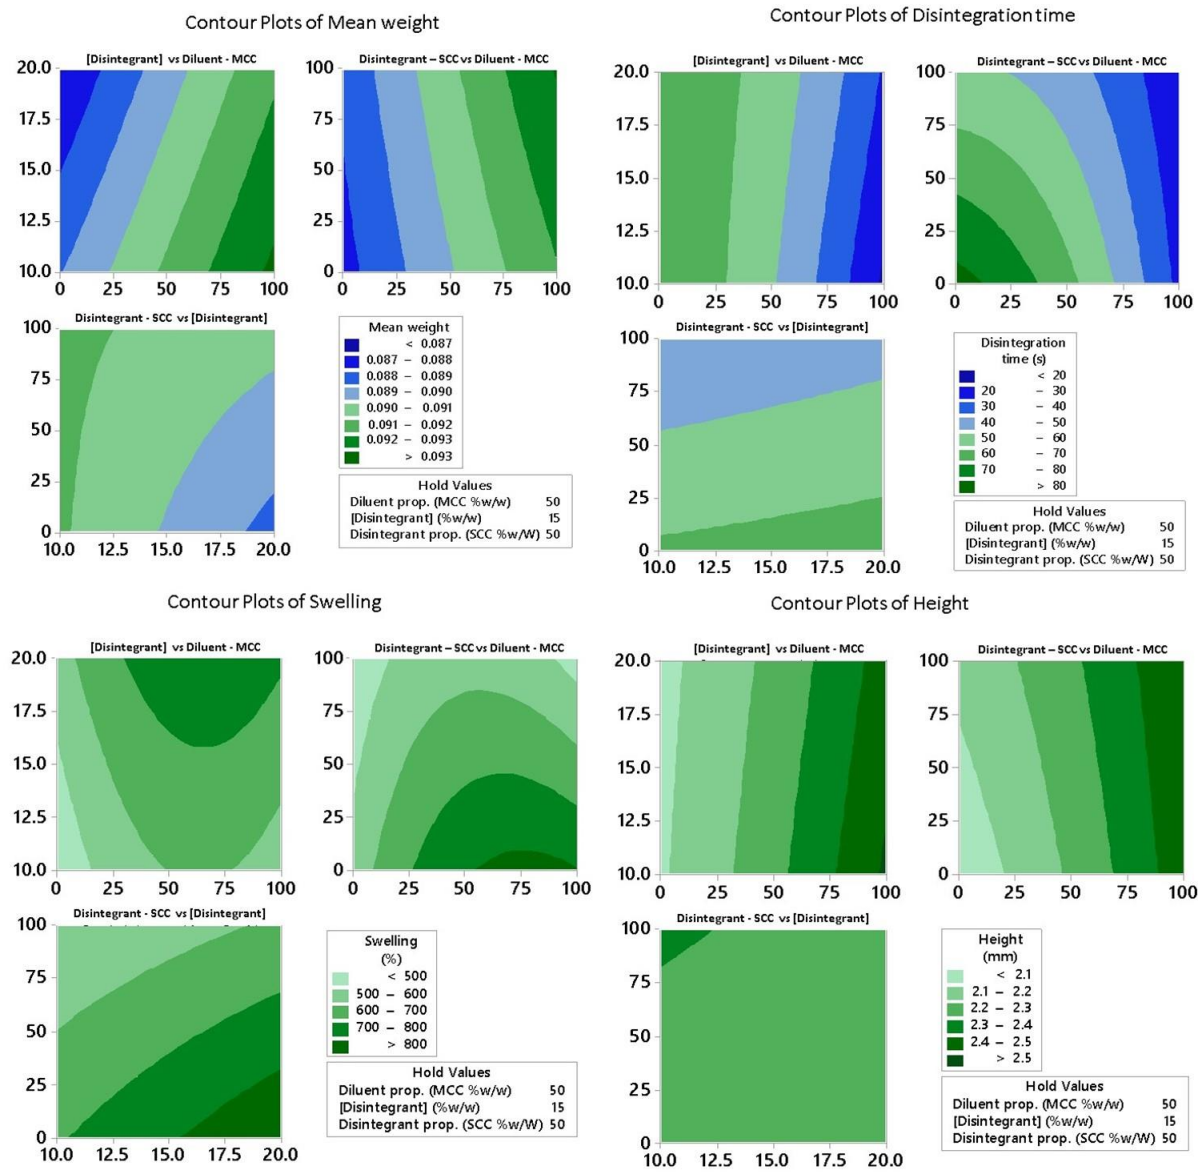

Table S2 - Response optimization from tablet base formulation DoE planning

| Response                | Goal    | Lower | Target | Upper | Weight | Importance |
|-------------------------|---------|-------|--------|-------|--------|------------|
| Height (mm)             | Maximum | 2.030 | 2.543  |       | 1      | 1          |
| Swelling (%)            | Minimum |       | 369.8  | 931.1 | 1      | 1          |
| Disintegration time (s) | Minimum |       | 16.0   | 85.7  | 1      | 1          |
| Mean weight             | Maximum | 0.086 | 0.094  |       | 1      | 1          |

## Solutions

| Solu-<br>tion | Diluent<br>Proportion<br>(MCC%w/w) | [Disinte-<br>grant]<br>(%w/w) | Disintegrant<br>Proportion<br>(SCC%w/W) | Height<br>(mm)<br>Fit | Swelling<br>(%)<br>Fit | Disintegra-<br>tion time<br>(s) Fit | Mean<br>Weight<br>Fit | Composite<br>Desirability |
|---------------|------------------------------------|-------------------------------|-----------------------------------------|-----------------------|------------------------|-------------------------------------|-----------------------|---------------------------|
| 1             | 100.0                              | 10                            | 100                                     | 2.54                  | 401.6                  | 15.2                                | 0.0934                | 0.981                     |
| 2             | 92.8                               | 10                            | 100                                     | 2.51                  | 432.2                  | 19.9                                | 0.0931                | 0.926                     |
| 3             | 91.9                               | 10                            | 100                                     | 2.50                  | 435.6                  | 20.4                                | 0.0930                | 0.919                     |
| 4             | 89.9                               | 10                            | 100                                     | 2.49                  | 443.1                  | 21.7                                | 0.0923                | 0.903                     |

## Multiple Response Prediction

| Variable                      | Setting      |              |                         |                         |
|-------------------------------|--------------|--------------|-------------------------|-------------------------|
| Diluent prop. (MCC %w/w)      | 100          |              |                         |                         |
| [Disintegrant] (%w/w)         | 10           |              |                         |                         |
| Disintegrant prop. (SCC %w/W) | 100          |              |                         |                         |
| Response                      | Fit          | SE Fit       | 95% CI                  | 95% PI                  |
| Height (mm)                   | 2.5433       | 0.0132       | (2.5012, 2.5854)        | (2.4817, 2.6050)        |
| Swelling (%)                  | 401.6        | 32.7         | (297.5, 505.6)          | (249.3, 553.8)          |
| Disintegration time (s)       | 15.21        | 2.11         | (8.48, 21.93)           | (5.36, 25.05)           |
| Mean weight                   | 0.09337<br>0 | 0.00059<br>9 | (0.091462,<br>0.095277) | (0.090578,<br>0.096162) |

Figure S3 - Response optimization from tablet base formulation DoE planning

|           |              |                |            |
|-----------|--------------|----------------|------------|
| Optimal   | Disintegrant |                | Diluent    |
| D: 0.9809 | Proportion   | [Disintegrant] | Proportion |
| High      | 100          | 20             | 100        |
| Current   | [100.0]      | [10.0]         | [100.0]    |
| Low       | 0.0          | 10.0           | 0.0        |

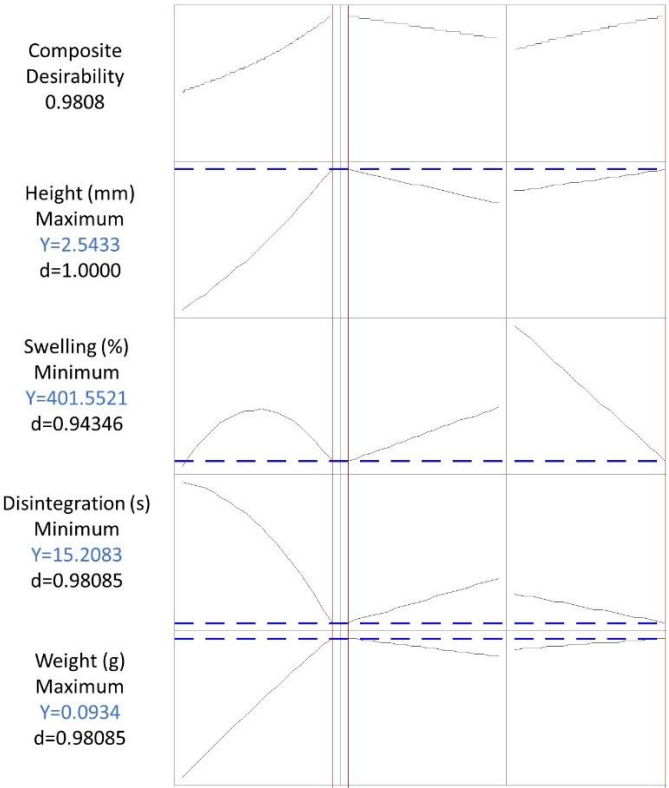

Supplement: s1 [file s1]
